# Supplementary material
Source: PubMed Central journal article supplement (PMC4837077)
Supplement: NIHMS767211-supplement-BIOS.pdf [file NIHMS767211-supplement-BIOS.pdf]

Hernan Garcia is an Assistant Professor of Molecular & Cell Biology and of Physics at the University of California, Berkeley. His interests lie in the development of theoretical models and novel technologies for synthetically and predictively querying and manipulating embryonic development. He is also a recipient of the Burroughs Wellcome Fund Career Award at the Scientific Interface and a co-author of the book “Physical Biology of the Cell” together with Rob Phillips, Julie Theriot and Jane Kondev, published by Garland Science.

Robert Brewster is an Assistant Professor in the Program in Systems Biology at the University of Massachusetts Medical School. A physicist by training, he is interested in quantitative pursuits in biology, primarily as it pertains to studies of gene expression and its regulation. In particular, he is interested in understanding the impact of cellular resource sharing on gene expression and thus on cellular decision making.

Rob Phillips is the Fred and Nancy Morris Professor of Biophysics and Biology at the California Institute of Technology and co-Director of the Physiology summer course at the Marine Biology Laboratory. His research focuses on elucidating the physical principles behind a variety of biological processes/systems, such as mechanosensation and gene regulation. Work in his laboratory combines physical modeling with quantitative experimentation. Along with Jane Kondev, Julie Theriot and Hernan Garcia he co-authored the biophysics textbook, Physical Biology of the Cell, an exploration of how physics and math can be applied to understand biology at molecular and cellular levels.
